# Supplementary material for: Bioinformatics Analysis Identified a Crucial Role of Tumor Immune Cell Infiltration in Hepatocellular Carcinoma
Source: Research Square preprint supplement (doi:10.21203/rs.3.rs-3945568/v1), 2024-02-14
Supplement: Supplementary file 1 [file 6b96746d9546fca5a054181a.docx]

**Supporting Table S1. The RNA-SEQ databases information**

| GEO no. | Species | Strain | Platforms | Description |
| --- | --- | --- | --- | --- |
| GSE46408 | [Homo sapiens](https://www.ncbi.nlm.nih.gov/Taxonomy/Browser/wwwtax.cgi?mode=Info&id=9606) | primary | Agilent-014850 Whole Human Genome Microarray 4x44K G4112F | The tissues from 6 primary hepatocellular carcinomas and their corresponding nontumourous liver parenchyma |
| GSE146049 | [Homo sapiens](https://www.ncbi.nlm.nih.gov/Taxonomy/Browser/wwwtax.cgi?mode=Info&id=9606) | NASH to HCC | Illumina HumanHT-12 V4.0 expression beadchip | The tissues from 5 patients with HCC were included (3 male/ 2 female) from the tumor and from nontumorous tissue. |
| GSE50579 | [Homo sapiens](https://www.ncbi.nlm.nih.gov/Taxonomy/Browser/wwwtax.cgi?mode=Info&id=9606) | HBV/ HCV/ alcohol/  Cryptogenic/ genetic hemochromatosis/  Alpha-1 antitrypsin deficiency to HCC | Agilent-028004 SurePrint G3 Human GE 8x60K Microarray | The tissues from 10 normal tissue and 67 hepatocellular carcinoma(HBV (n=8), HCV (n=9), alcohol (n=10), cryptogenic (n=11), genetic hemochromatosis (n=3), Alpha-1 antitrypsin deficiency (n=2), HCC-Grad: G1-G3(n=24)) |
| GSE115018 | [Homo sapiens](https://www.ncbi.nlm.nih.gov/Taxonomy/Browser/wwwtax.cgi?mode=Info&id=9606) | primary | Agilent-067406 Human CBC lncRNA + mRNA microarray V4.0 | The tissues from 12 hepatocellular carcinomas and the para cancerous normal tissues of 2 cm away from the cancer tissue |
| GSE101685 | [Homo sapiens](https://www.ncbi.nlm.nih.gov/Taxonomy/Browser/wwwtax.cgi?mode=Info&id=9606) | primary | [HG-U133_Plus_2] Affymetrix Human Genome U133 Plus 2.0 Array | The tissues from 8 normal tissue and 24 hepatocellular carcinoma Taiwanese patients with stage T1, T3a, T3b |

|  | GSE101685 | | GSE50579 | | GSE115018 | | GSE46408 | | GSE146049 | | Expression |
| --- | --- | --- | --- | --- | --- | --- | --- | --- | --- | --- | --- |
| Gene name | adj.P.Val | logFC | adj.P.Val | logFC | adj.P.Val | logFC | adj.P.Val | logFC | adj.P.Val | logFC | up |
| ASPM | 0.000000000126 | 4.5729801 | 0.00333 | 2.2766044 | 0.0000238 | 3.27789183 | 0.0002444 | 4.857997 | 0.00120227 | 1.7 | up |
| CDKN3 | 0.000000201 | 3.5667717 | 0.00186 | 2.9423859 | 0.0000601 | 3.31142601 | 0.0000833 | 5.283524 | 0.00279753 | 1.3 | up |
| DTL | 0.0000000360 | 4.0260034 | 0.00320 | 2.6345474 | 0.000169 | 3.26187693 | 0.0019088 | 3.1315203 | 0.00736053 | 0.868 | up |
| CCNB2 | 0.0000000179 | 3.1286988 | 0.000112 | 3.7015563 | 0.000772 | 2.73422702 | 0.0002338 | 4.3422688 | 0.00473754 | 1.09 | up |
| ZWINT | 0.00000000210 | 3.7323006 | 0.0199 | 1.7153335 | 0.000596 | 2.55982104 | 0.0034964 | 3.3807027 | 0.01647617 | 0.713 | up |
| RACGAP1 | 0.0000000194 | 3.5723467 | 0.000375 | 2.2193912 | 0.000569 | 2.52630236 | 0.0013843 | 3.9029779 | 0.00393227 | 0.963 | up |
| PBK | 0.000000298 | 3.979068 | 0.00462 | 2.7034982 | 0.000154 | 2.63826791 | 0.0006155 | 5.2251072 | 0.00228278 | 0.635 | up |
| HMMR | 0.000000334 | 3.6010453 | 0.00106 | 2.6127262 | 0.000109 | 3.09277396 | 0.0006737 | 3.8367202 | 0.00166691 | 1.2 | up |
| TOP2A | 0.0000000000473 | 4.7443196 | 0.0466 | 2.2054571 | 0.0000507 | 3.66710731 | 0.0003012 | 5.5304897 | 0.00216994 | 1.85 | up |
| NUSAP1 | 0.0000333 | 2.9997824 | 0.0123 | 1.6272244 | 0.013 | 1.50213219 | 0.0027817 | 2.9633817 | 0.00161794 | 1.48 | up |
| CDK1 | 0.00000000155 | 3.3834163 | 0.00301 | 2.7858543 | 0.000369 | 2.96539516 | 0.0002338 | 4.9943732 | 0.0053674 | 1.02 | up |
| DLGAP5 | 0.00000000918 | 3.442391 | 0.0135 | 2.3372414 | 0.000155 | 1.97617579 | 0.0003012 | 5.0737187 | 0.00808636 | 0.75 | up |

**Supporting Table S2. The list of 12 core genes in indicated GSE data**
