# Supplementary material for: Bioinformatics Analysis Identified a Crucial Role of Tumor Immune Cell Infiltration in Hepatocellular Carcinoma
Source: Research Square preprint supplement (doi:10.21203/rs.3.rs-3945568/v1), 2024-02-14
Supplement: Supplementary file 2 [file dd8fbb641a0a9dcd263ccac1.docx]

**Supplemental Figure 1. Expression of key genes in CHOL from TCGA
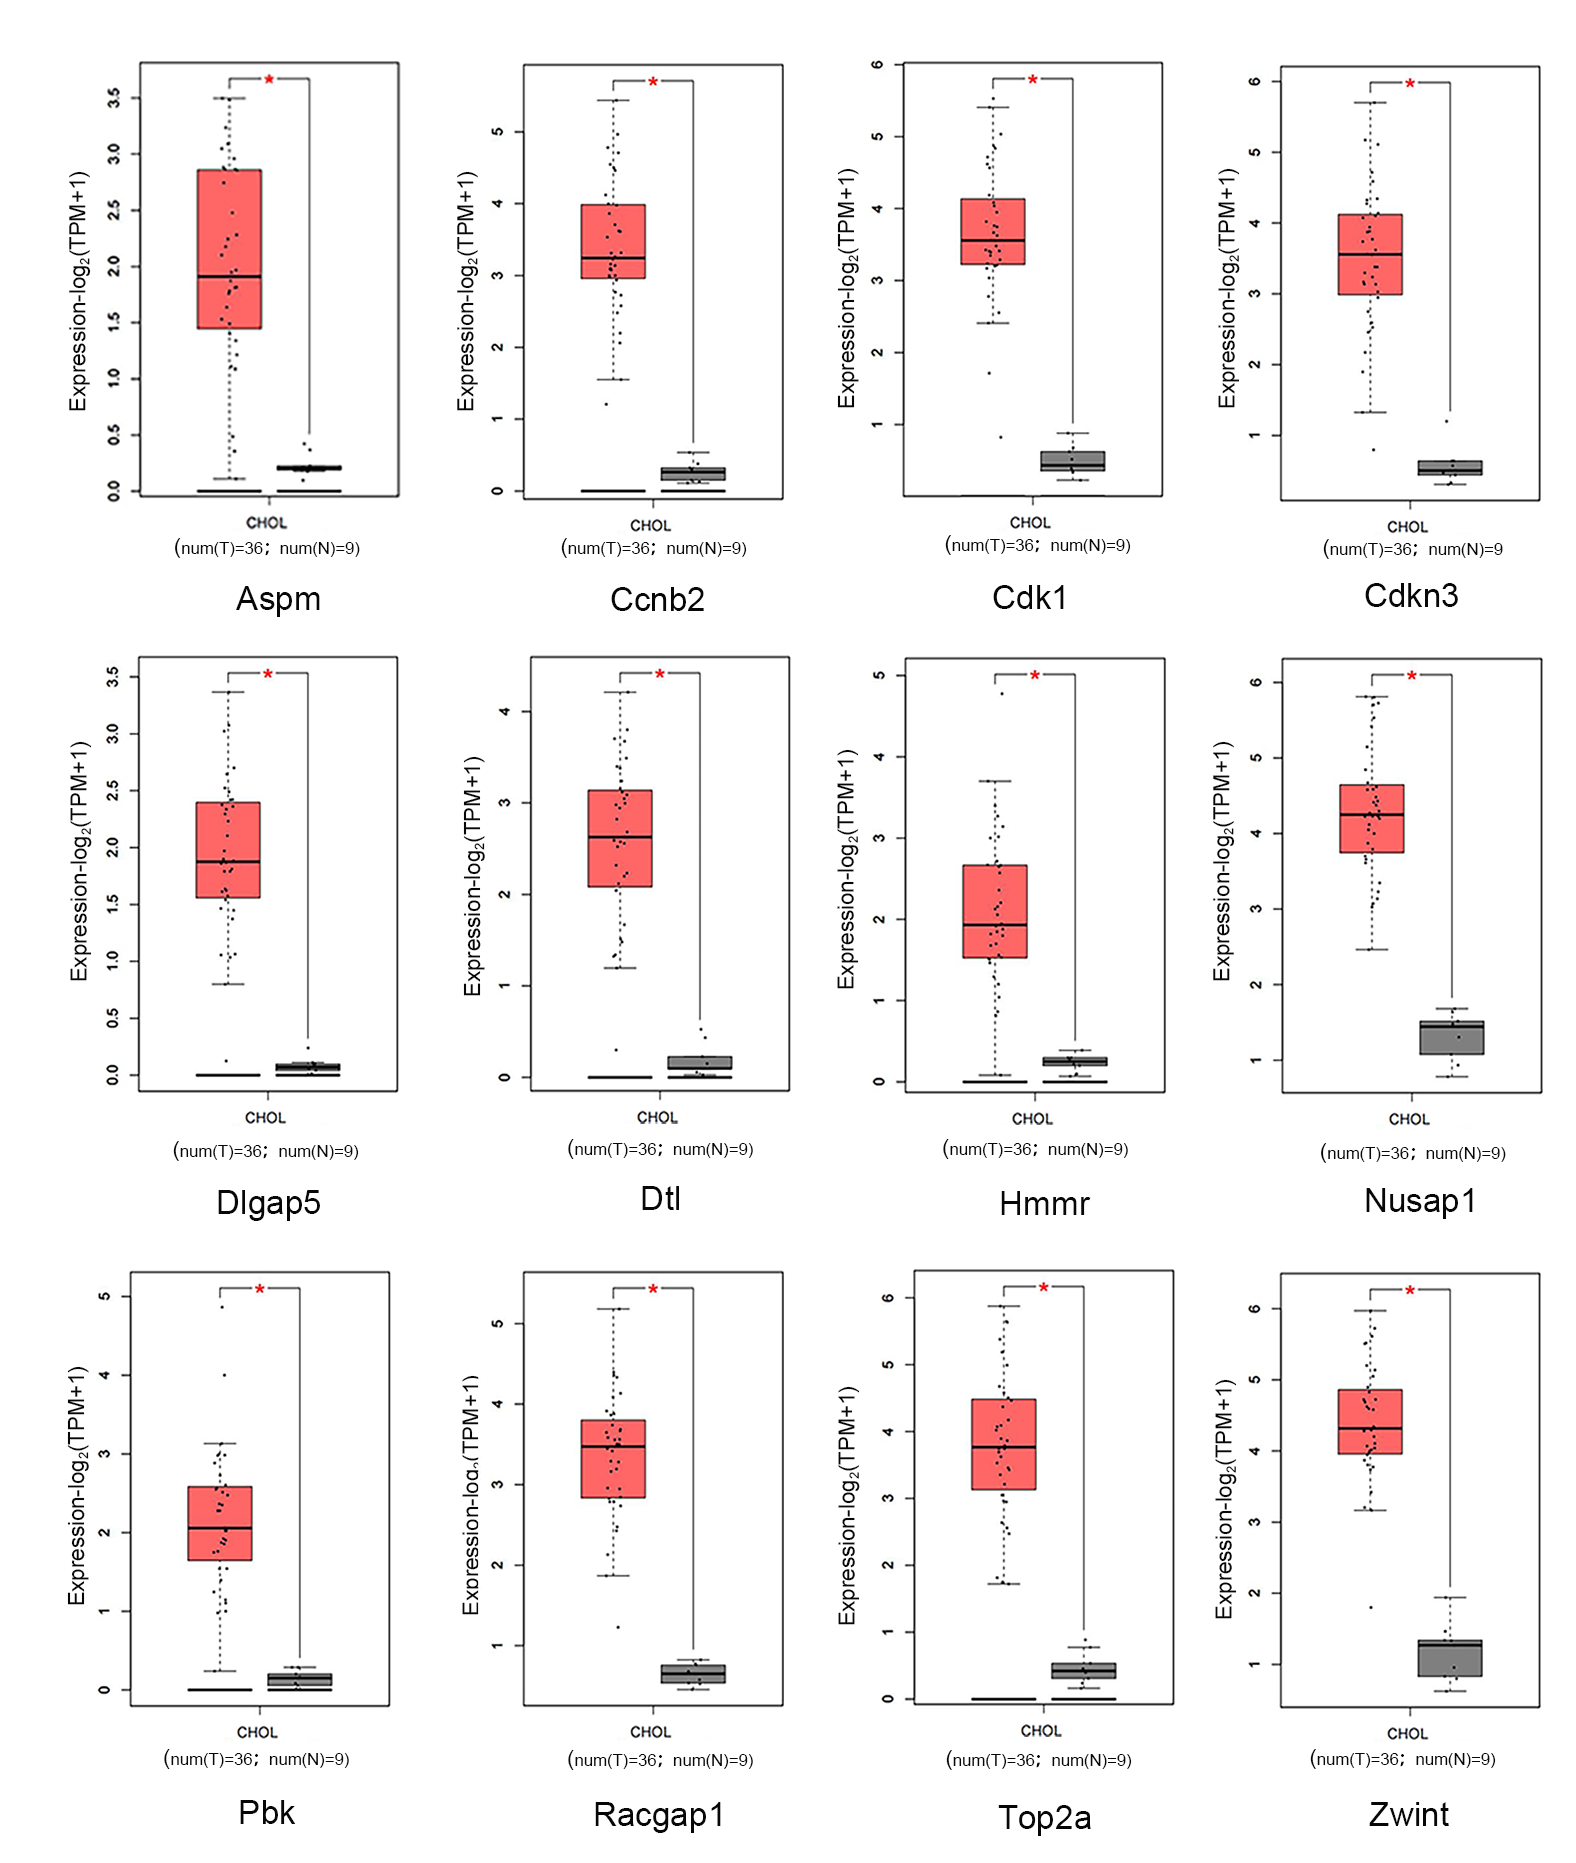
**

mRNA expression analysis of *Aspm, Ccnb2, Cdk1, Cdkn3, Dlgap5, Dtl, Hmmr, Nusap1, Pbk, Racgap1, Top2a, Zwint* in CHOL from TCGA. Red represents tumor tissue, and gray represents normal tissue. **P*<0.01.

**Supplemental Figure 2. Expression of CDK1 and DLGAP5**

**
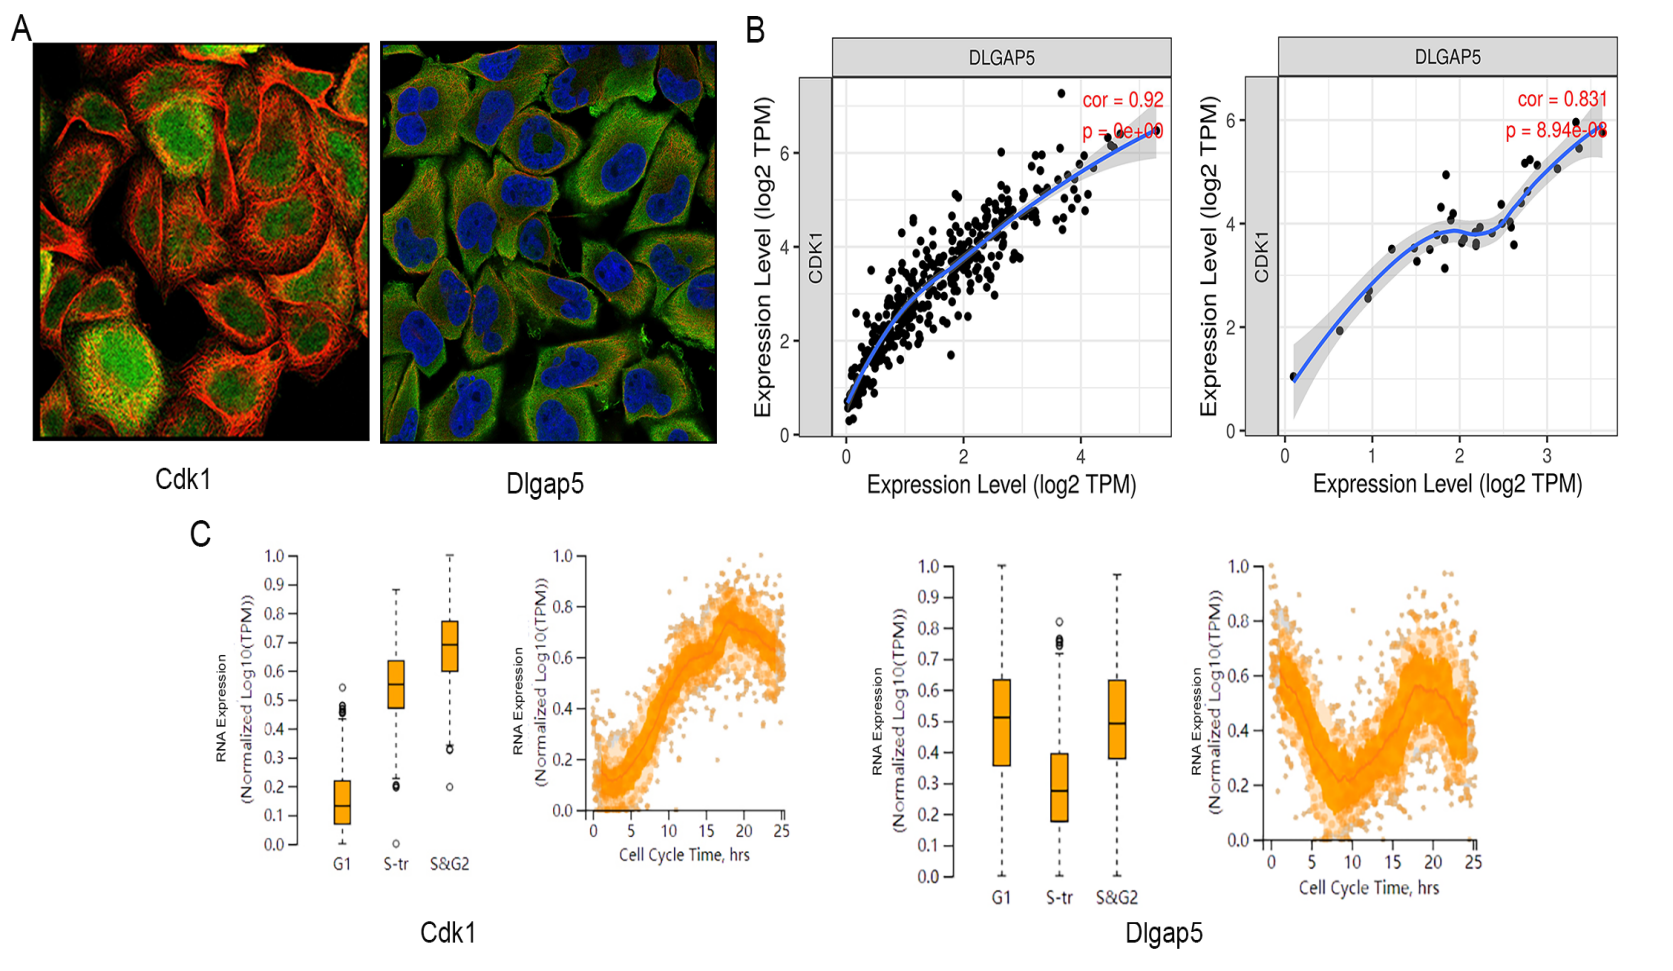
**

**(A)** Immunofluorescence staining of CDK1 and DLGAP5 in liver cancer. Nuclei, blue; microtubules, red; target protein, green. **(B)** Relative expression of CDK1 and DLGAP5 in LICH and CHOL. **(C)** RNA expression of CDK1 and DLGAP5 in different time of cell cycle.
